# Supplementary material
Source: Springer Nature journal article supplement (https://www.springermedizin.de/resource/supplementary/12889_2011_3901_MOESM1_ESM.pdf/9489736)
Supplement: MOESM1 [file 9489736]

Meteorological factors

The diagram consists of three blue rectangular boxes arranged in a descending staircase pattern from top-left to bottom-right. The top box is labeled 'Meteorological factors', the middle box is labeled 'Tree pollen', and the bottom box is labeled 'Patients with tree pollen allergy'. Blue arrows point from the bottom-right corner of the first box to the top-left corner of the second box, and from the bottom-right corner of the second box to the top-left corner of the third box. Below the boxes is a horizontal timeline with tick marks for each month from February to July, labeled 'Month' at the bottom center.

Tree pollen

Patients with tree pollen allergy

Feb

Mar

Apr

May

Jun

Jul

Month
